# Supplementary material
Source: PubMed Central journal article supplement (PMC7195049)

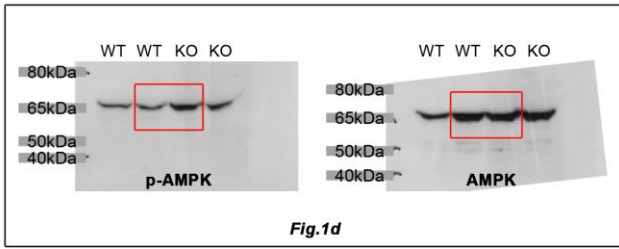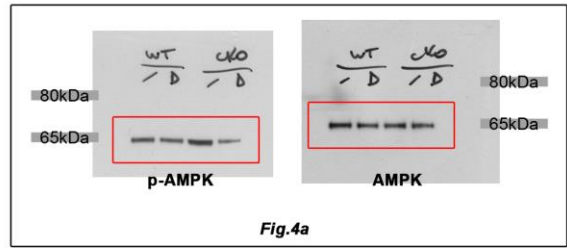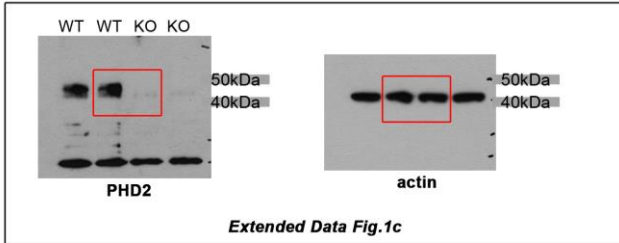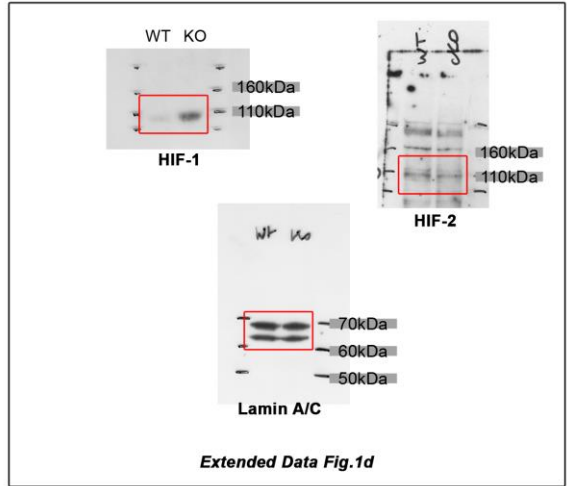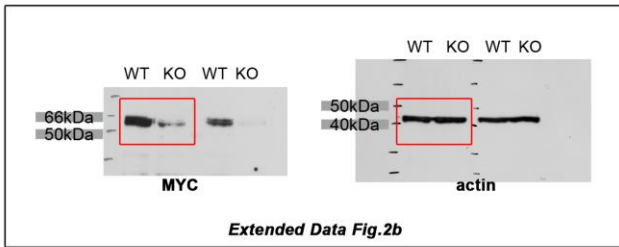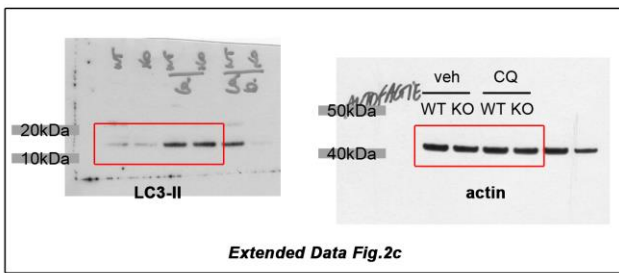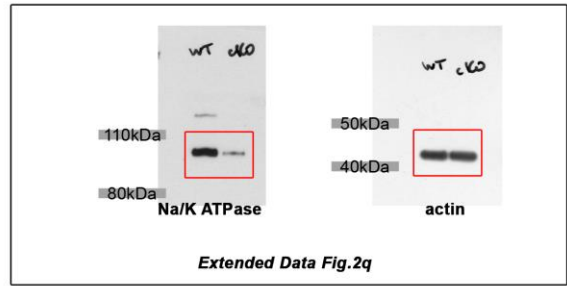

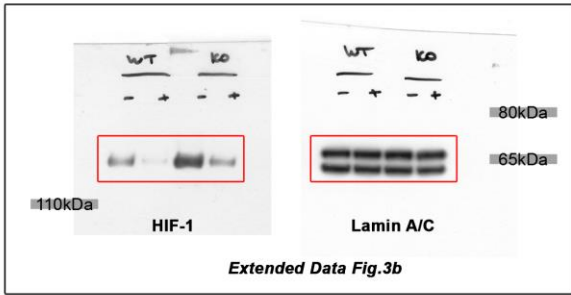

Extended Data Fig.3b

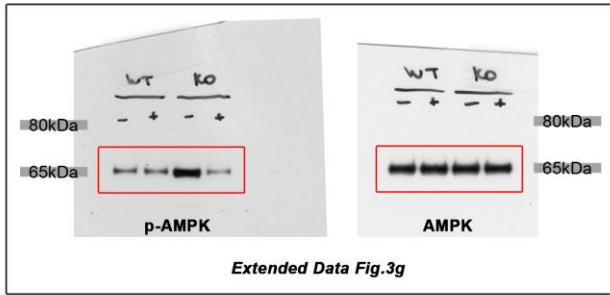

Extended Data Fig.3g

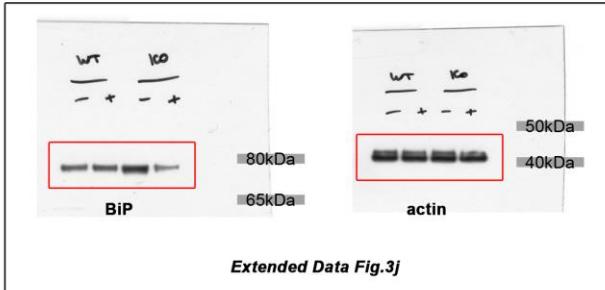

Extended Data Fig.3j

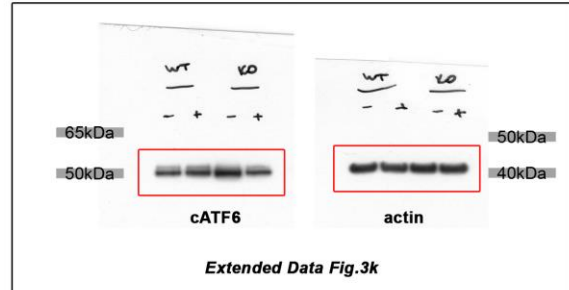

Extended Data Fig.3k

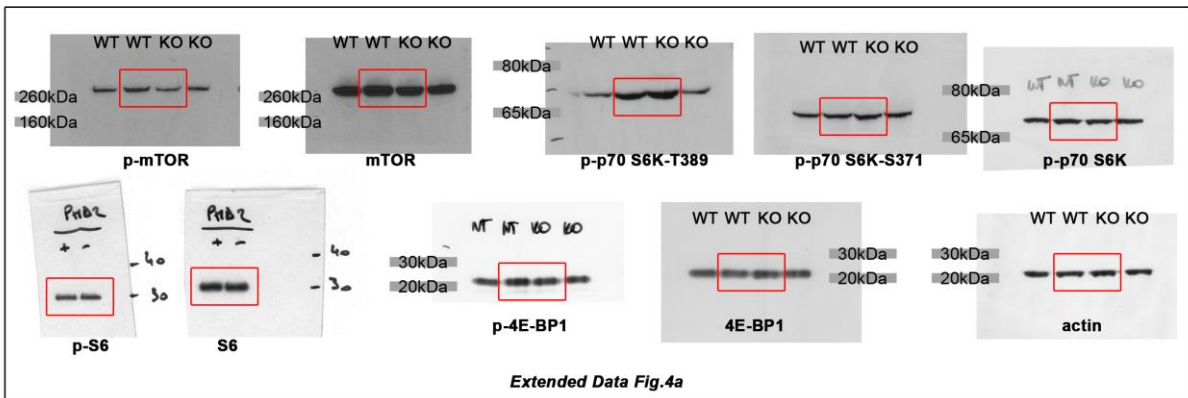

Extended Data Fig.4a

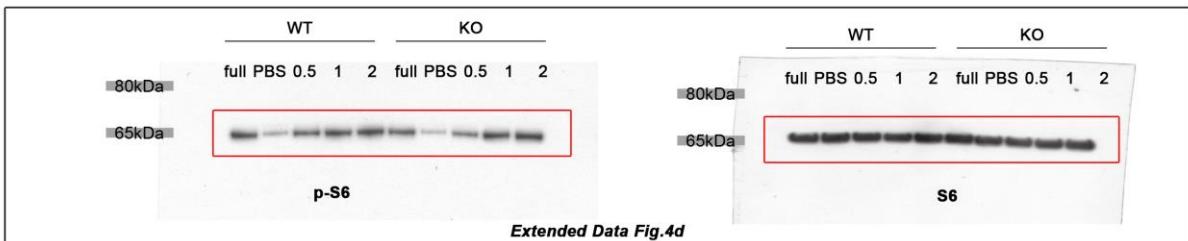

Extended Data Fig.4d

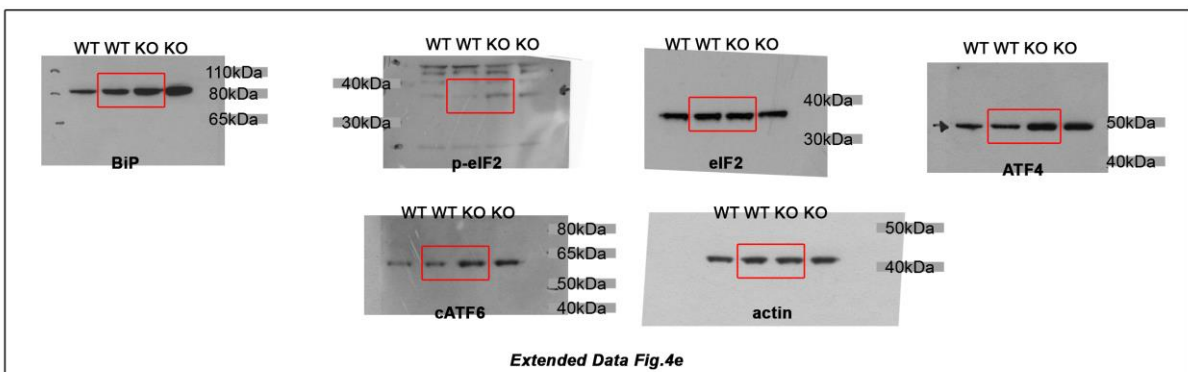

Extended Data Fig.4e

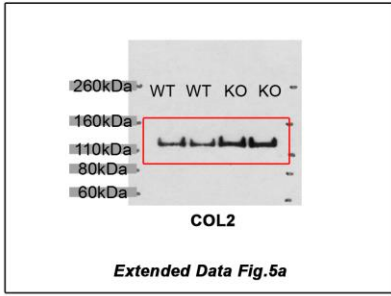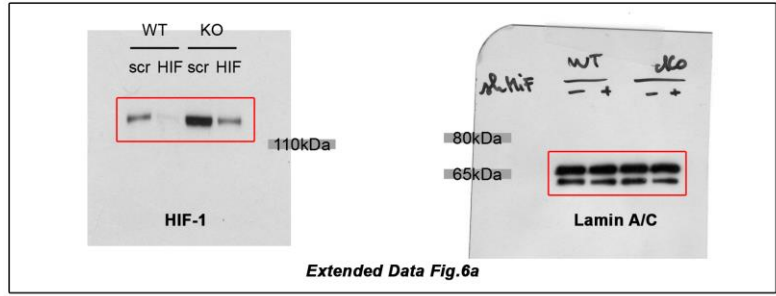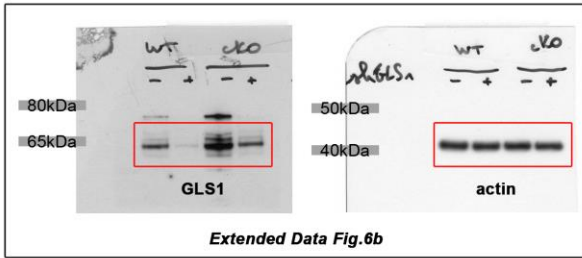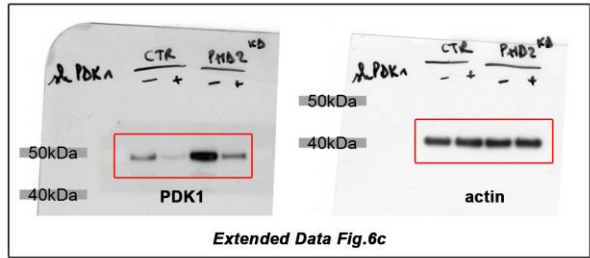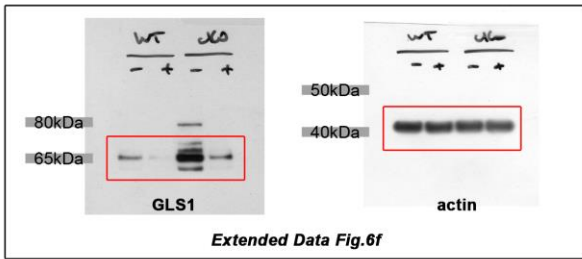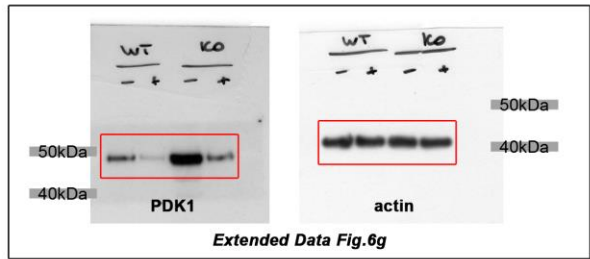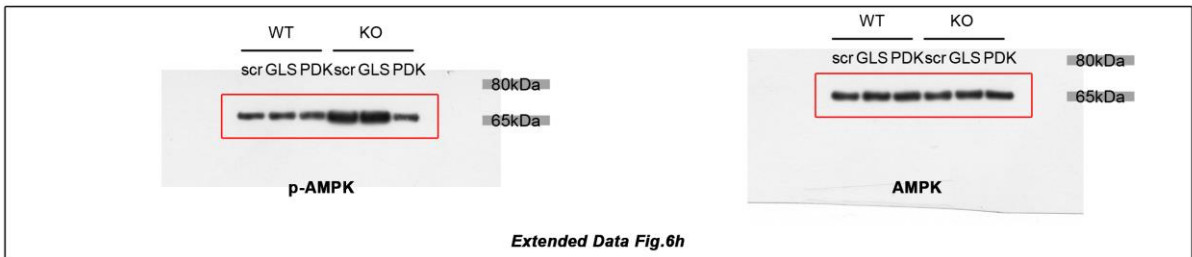

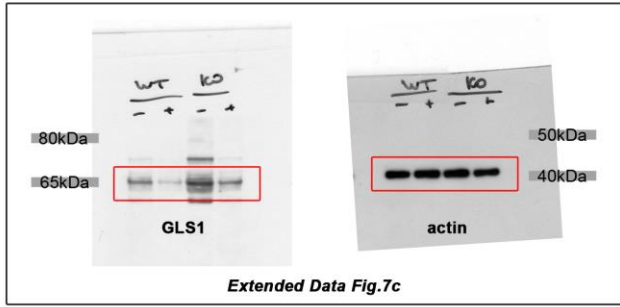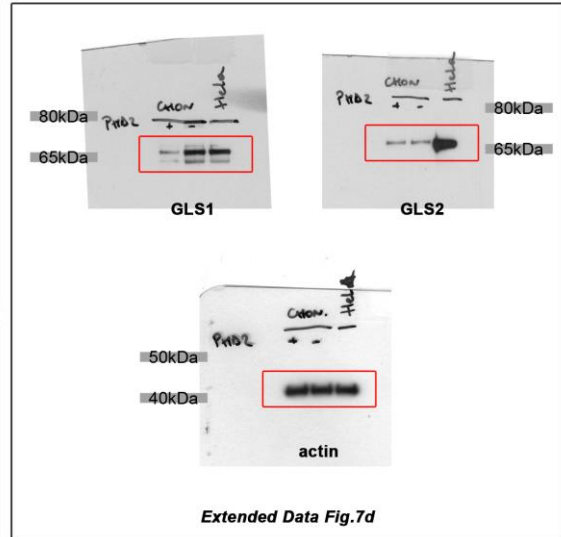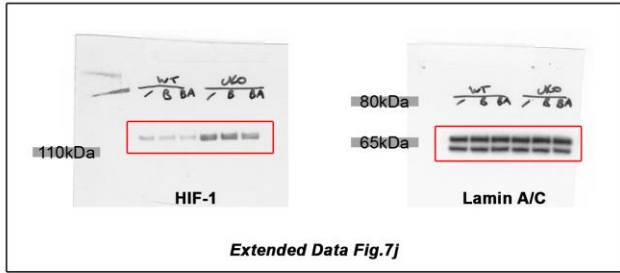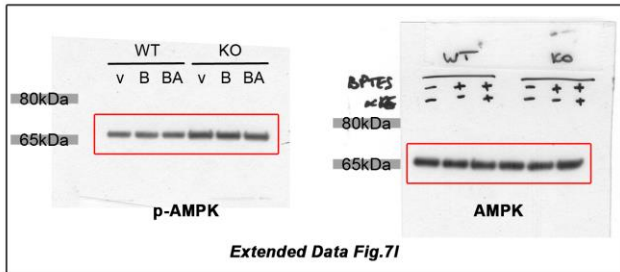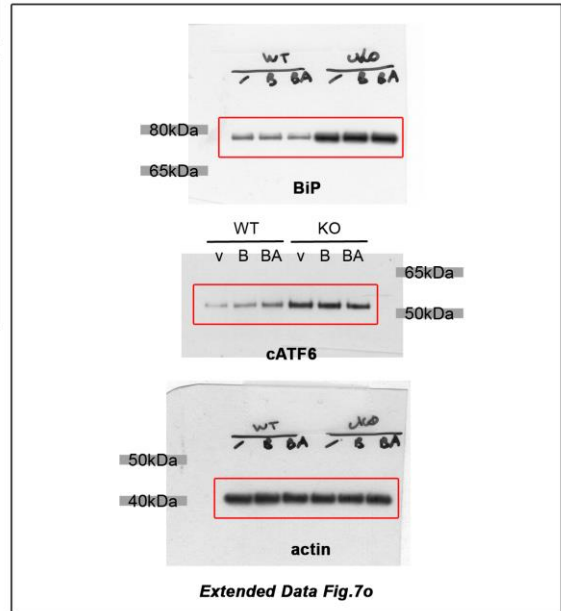

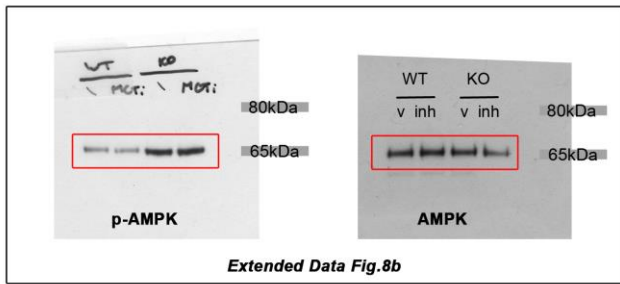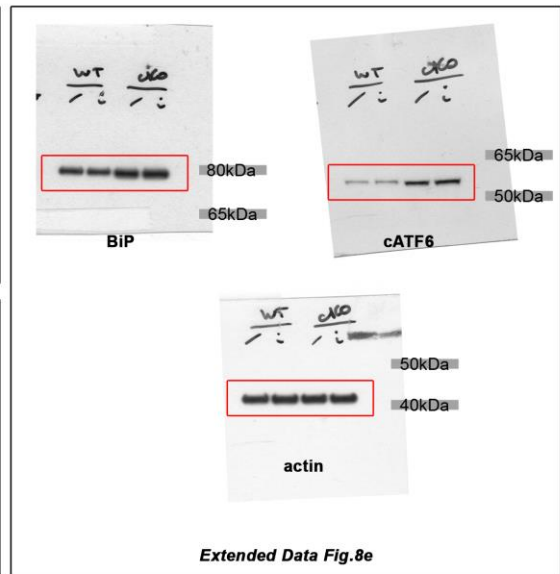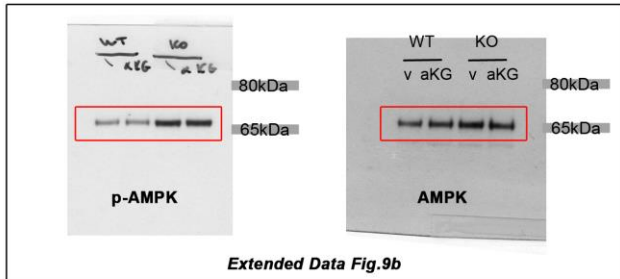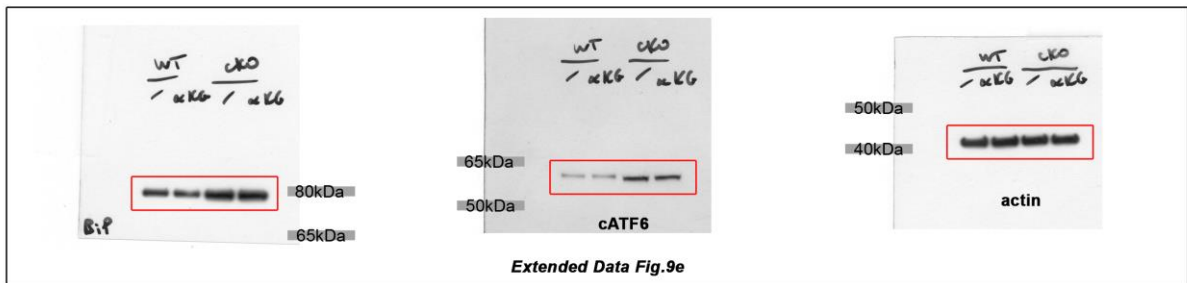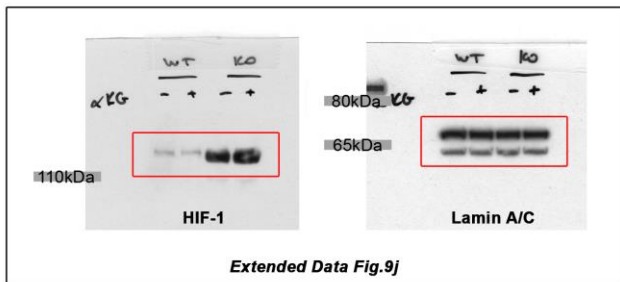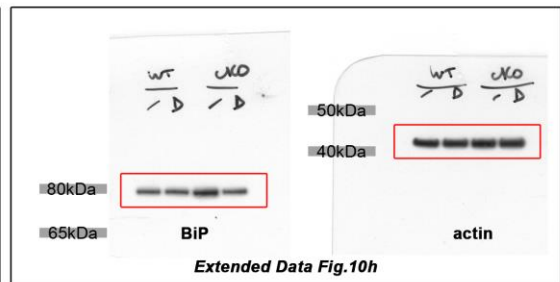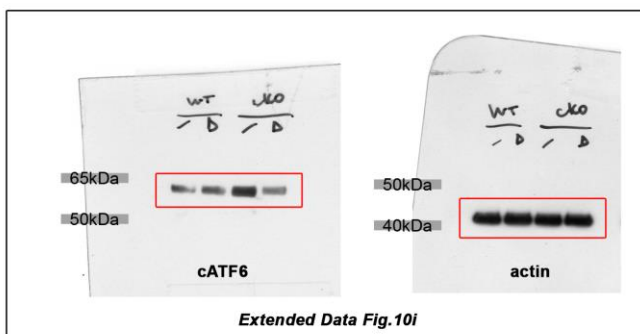

Supplement: NIHMS1576233-supplement-SuppFig1.pdf [file NIHMS1576233-supplement-SuppFig1.pdf]
